# Supplementary material for: Nascent chain dynamics and ribosome interactions within folded ribosome–nascent chain complexes observed by NMR spectroscopy
Source: PubMed Central journal article supplement (PMC8513902; doi:10.1039/d1sc04313g), 2021-09-09
Supplement: SC-012-D1SC04313G-s001.pdf [file SC-012-D1SC04313G-s001.pdf]

## Supplementary Information

### Nascent chain dynamics and ribosome interactions within folded ribosome–nascent chain complexes observed by NMR spectroscopy

Charles Burridge, Christopher A. Waudby\*, Tomasz Włodarski, Anaïs M. E. Cassaignau, Lisa D. Cabrita and John Christodoulou\*

Department of Structural and Molecular Biology, University College London, London WC1E 6BT, UK.

\* Email: c.waudby@ucl.ac.uk, j.christodoulou@ucl.ac.uk

#### Table of Contents

##### Supplementary Figures

- Fig. S1 Annotated crystal structure of FLN5
- Fig. S2  $^1\text{H}, ^{13}\text{C}$  HMQC spectra of unoccupied 70S ribosomes and unlabeled isolated bL12
- Fig. S3 Pulse program for the measurement of methyl  $^1\text{H}$   $R_2$  relaxation rates
- Fig. S4 Time courses for quality control of RNC samples
- Fig. S5 Methyl  $^1\text{H}$   $R_2$  measurements for isolated FLN5 and FLN5+67 RNC
- Fig. S6 Correlation between  $^1\text{H}$   $R_2$  rates and  $S_{axis}^2 \tau_c$  values in isolated FLN5 vs glycerol
- Fig. S7 Correlation between  $S_{axis}^2 \tau_c$  values in isolated FLN5 and FLN5+67 RNC
- Fig. S8 Comparison of  $^1\text{H}, ^{13}\text{C}$  HMQC spectra of FLN5 wild-type, K2 and K5 variants.

##### Supplementary Tables

- Table S1 Protein sequences for nascent chains used in this study
- Table S2 Methyl  $^1\text{H}$   $R_2$  for isolated FLN5 vs glycerol concentration
- Table S3 Methyl  $S_{axis}^2 \tau_c$  values for isolated FLN5 vs glycerol concentration
- Table S4 Methyl  $^1\text{H}$   $R_2$  measurements for RNCs
- Table S5 Calculated methyl  $S_{axis}^2 \tau_c$  values for RNCs

##### References

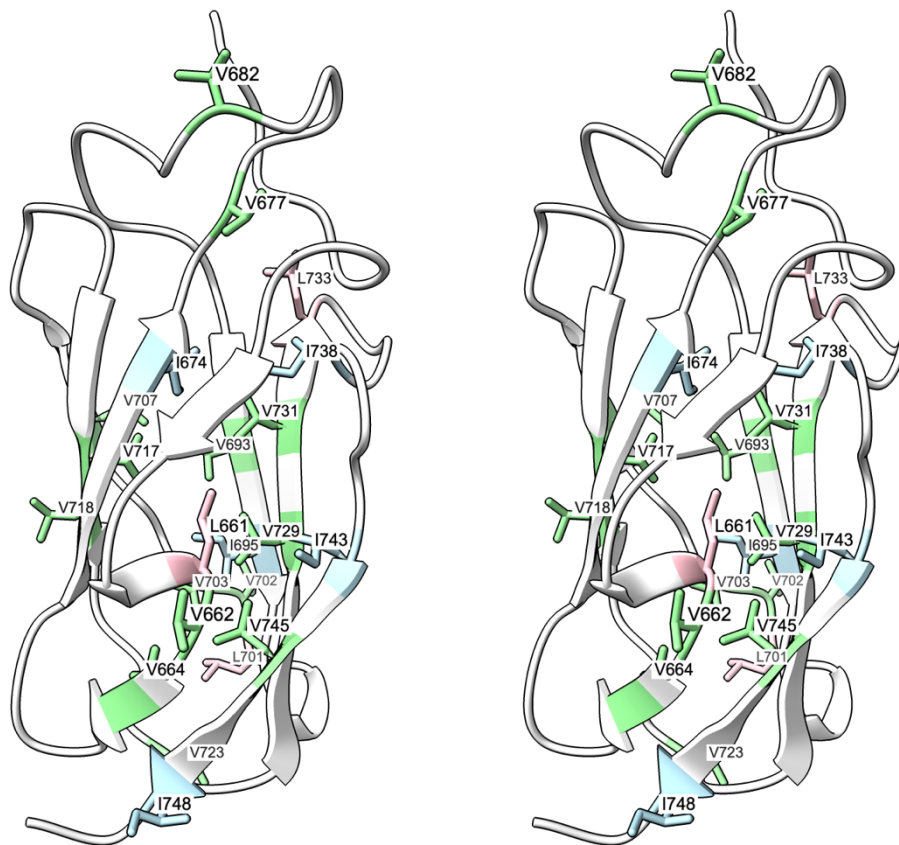

**Supplementary Figure 1:** Stereoview cartoon representation of the FLN5 crystal structure (pdb: 1qfh) showing the location of isoleucine, leucine and valine residues.

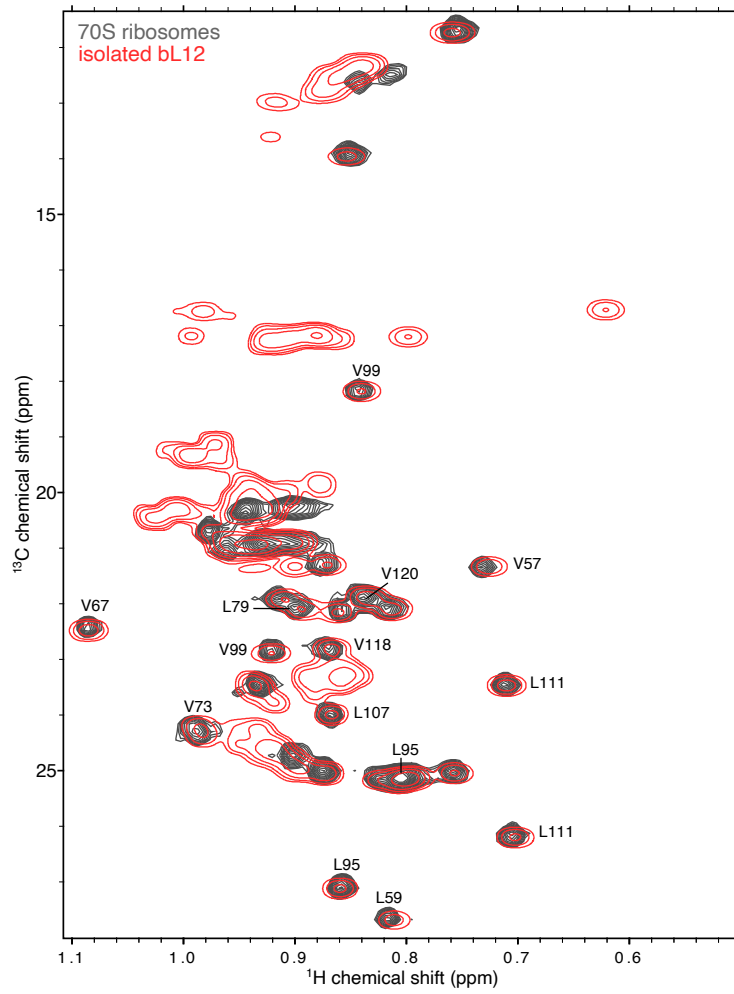

**Supplementary Figure 2:**  $^1\text{H},^{13}\text{C}$  HMQC spectra of ILV-labelled unoccupied 70S ribosomes (black, 298 K, 950 MHz) and unlabeled isolated bL12 (red, 298 K, 700 MHz).

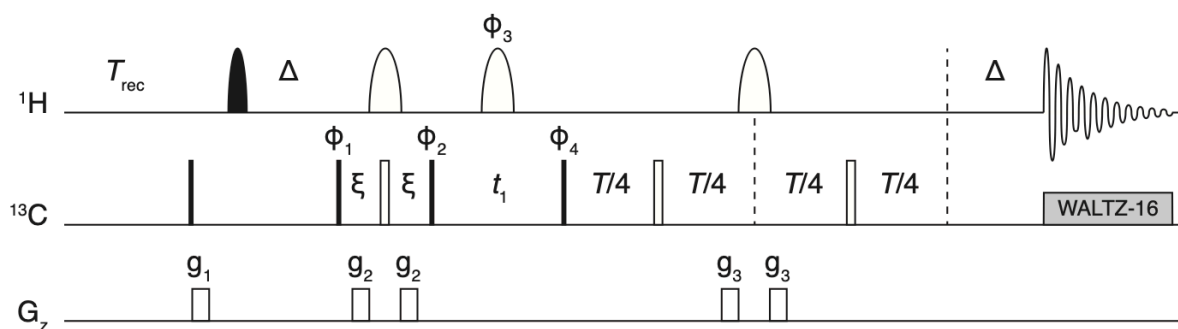

**Supplementary Figure 3:** Pulse program for the measurement of methyl  $^1\text{H}$   $R_2$  relaxation rates, based on a methyl SOFAST-HMQC experiment incorporating a filter for slowly relaxing inner transitions.  $T$  is the relaxation time,  $\Delta = 1/2J_{\text{CH}} = 4$  ms, and  $\xi = 1/8J_{\text{CH}} = 1$  ms.  $^1\text{H}$  shaped pulses were applied at 0.5 ppm; the solid pulse represents a  $120^\circ$  Pc9 excitation pulse (1120  $\mu\text{s}$  at 950 MHz) and the hollow pulse represents a  $180^\circ$  Rsnob pulse (564  $\mu\text{s}$  at 950 MHz). Phase cycles:  $\phi_1 = 0^\circ, 180^\circ$ ;  $\phi_2 = (0^\circ)_2, (180^\circ)_2$ ;  $\phi_3 = (0^\circ)_8, (120^\circ)_8, (240^\circ)_8$ ;  $\phi_4 = (0^\circ)_4, (180^\circ)_4$  and  $\phi_{\text{rx}} = 0^\circ, 180^\circ, 0^\circ, 180^\circ, 180^\circ, 0^\circ, 180^\circ, 0^\circ, 120^\circ, 300^\circ, 120^\circ, 300^\circ, 300^\circ, 120^\circ, 300^\circ, 120^\circ, 240^\circ, 60^\circ, 240^\circ, 60^\circ, 60^\circ, 240^\circ, 60^\circ, 240^\circ$ , with  $\phi_4$  incremented for States-TPPI quadrature detection. Gradient length, shape and power are:  $g_1 = 1$  ms (SMSQ10.100, 31%);  $g_2 = 50$   $\mu\text{s}$  (SINE.10, -40%);  $g_3 = 100$   $\mu\text{s}$  (SINE.10, 11%).

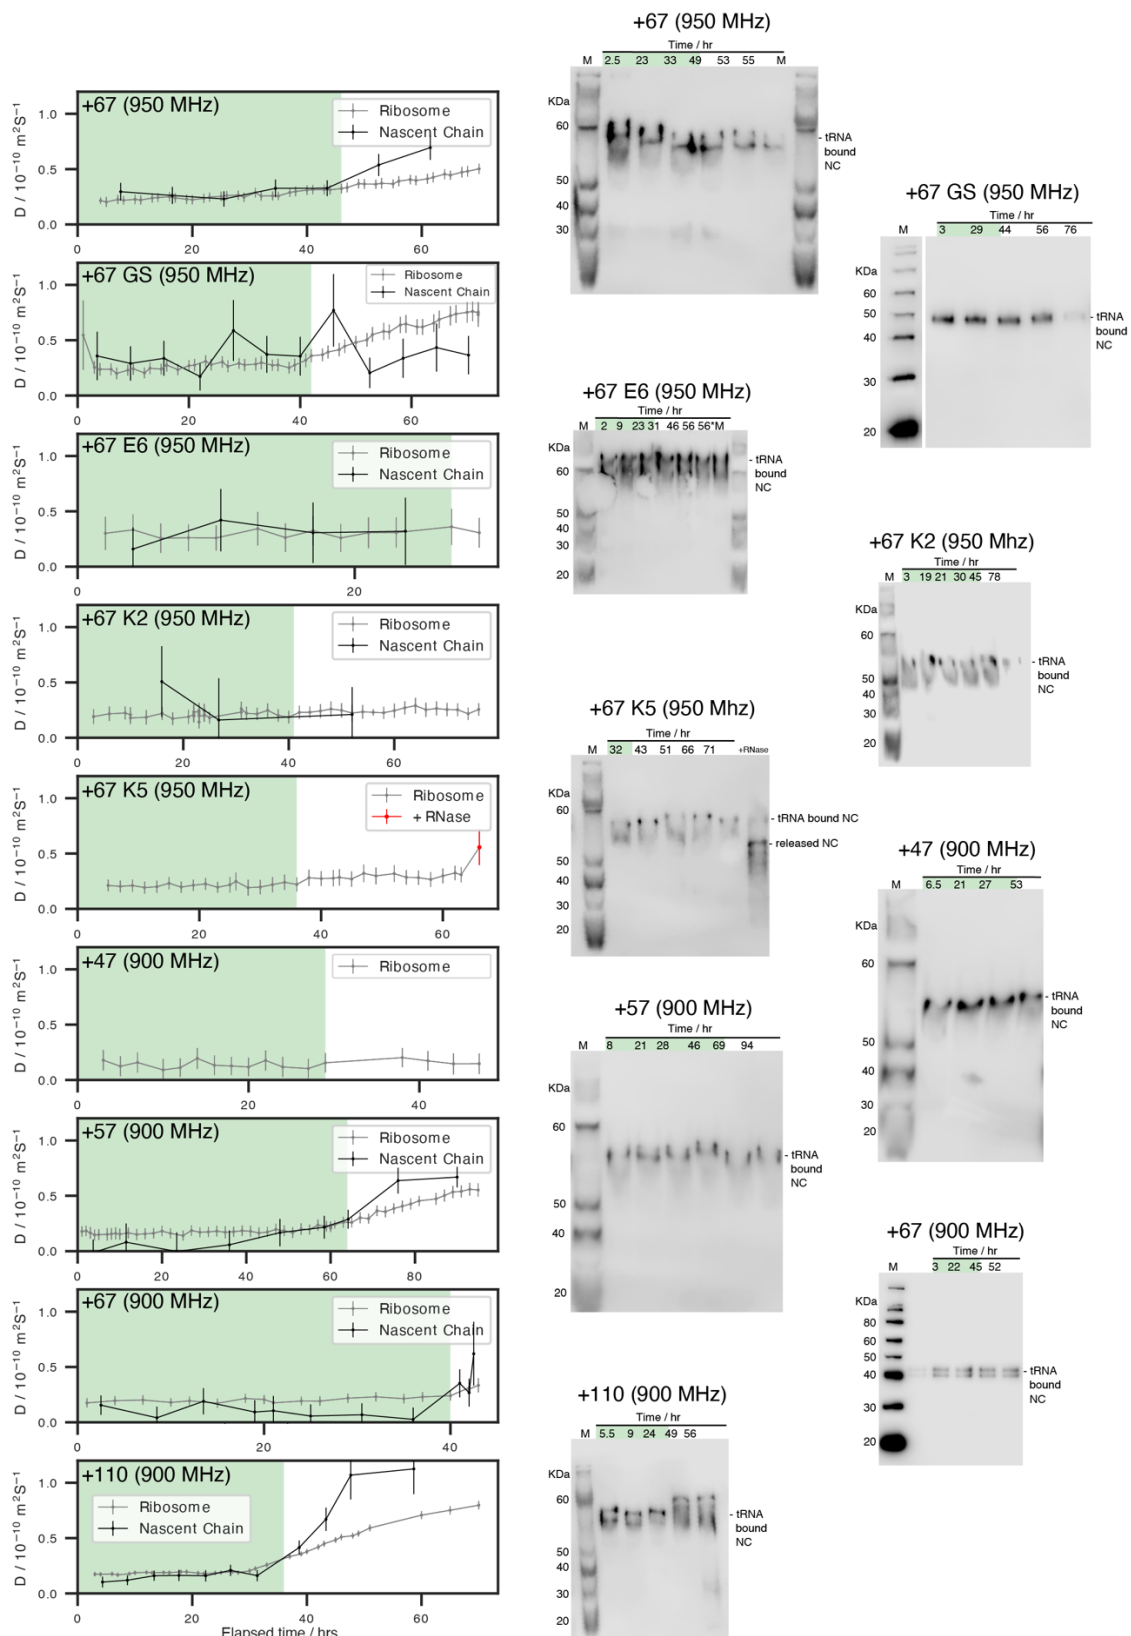

**Supplementary Figure 4:** Time courses for quality control of RNC samples. (A) Time course of nascent chain (l674, l738, l695 methyl resonances) and bL12 diffusion coefficients during data acquisition, shaded green area indicates measurement time used for analysis (B) Time course of nascent chain attachment by western blot (anti-histidine), using 2 pmol RNC aliquots taken periodically from a sample incubated in parallel with NMR data acquisition. The tRNA-bound nascent chain and released NC is indicated.

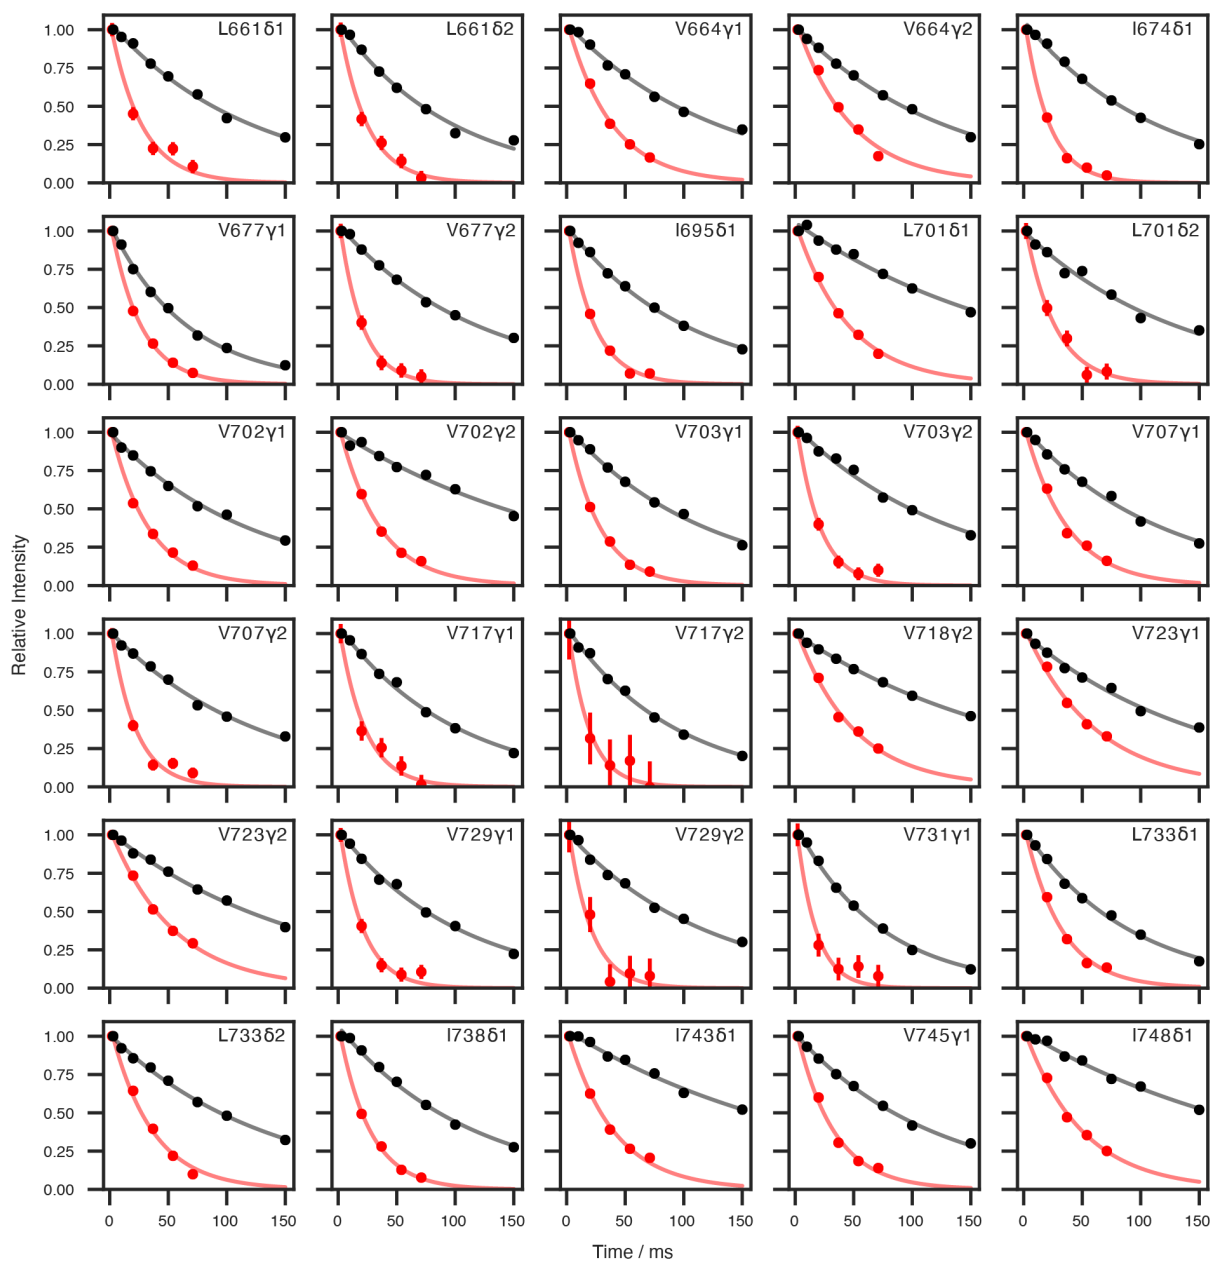

**Supplementary Figure 5:** Methyl  $^1\text{H}$   $R_2$  measurements for isolated FLN5 (black) and FLN5+67 RNC (red) (298 K, 950 MHz).

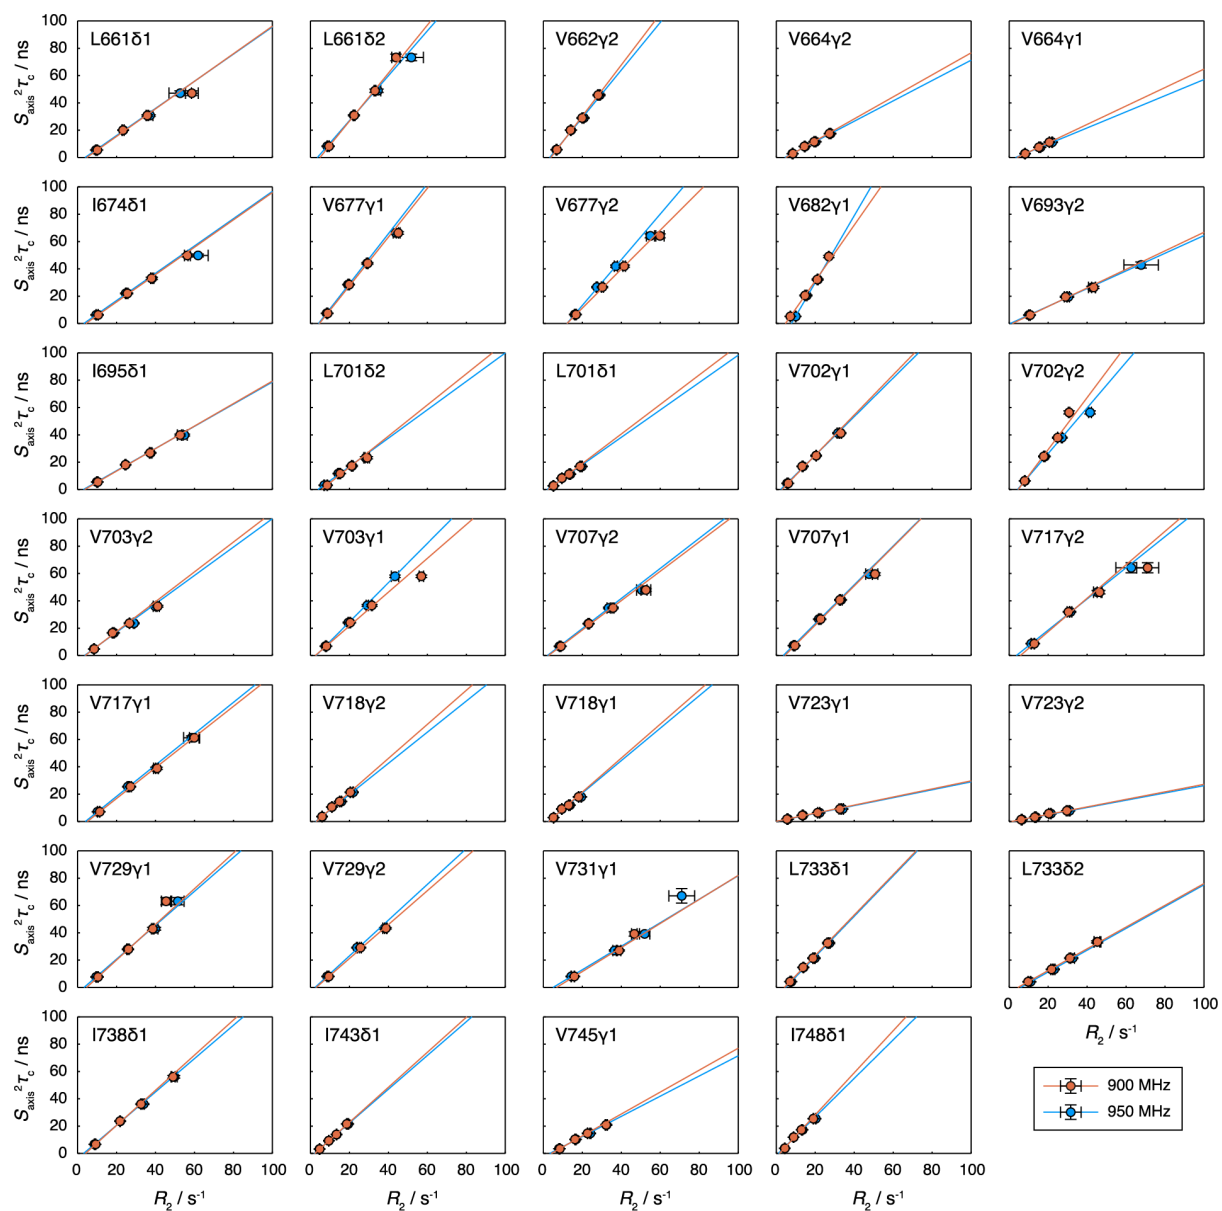

**Supplementary Figure 6:** Correlation between  $^1H$   $R_2$  rates and  $S^2_{axis} T_c$  values for isoleucine, leucine and valine methyls in isolated FLN5 at varying concentrations of  $d_8$ -glycerol at 298 K, with  $^1H$   $R_2$  rates acquired at 900 MHz (orange) or 950 MHz (blue).

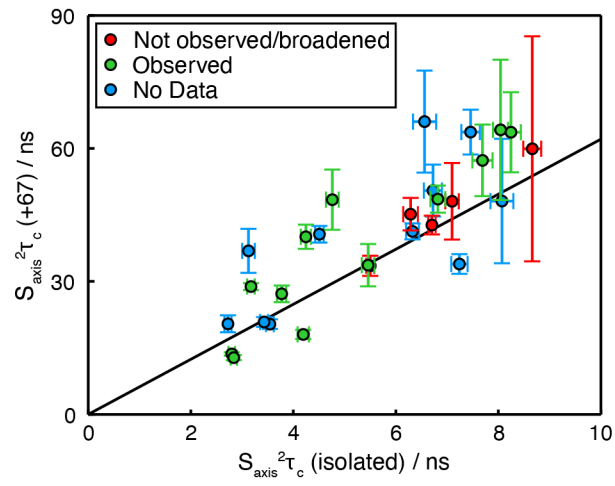

**Supplementary Figure 7:** Correlation between  $S_{axis}^2 \tau_c$  values measured for isolated FLN5, and  $S_{axis}^2 \tau_c$  values determined from  $^1\text{H}$   $R_2$  rates for the FLN5+67 RNC as shown in Fig. 2D, colored by observability of resonances previously reported for a uniformly  $^1\text{H}$ ,  $^{13}\text{C}$ -labelled FLN5 RNC<sup>1</sup>.



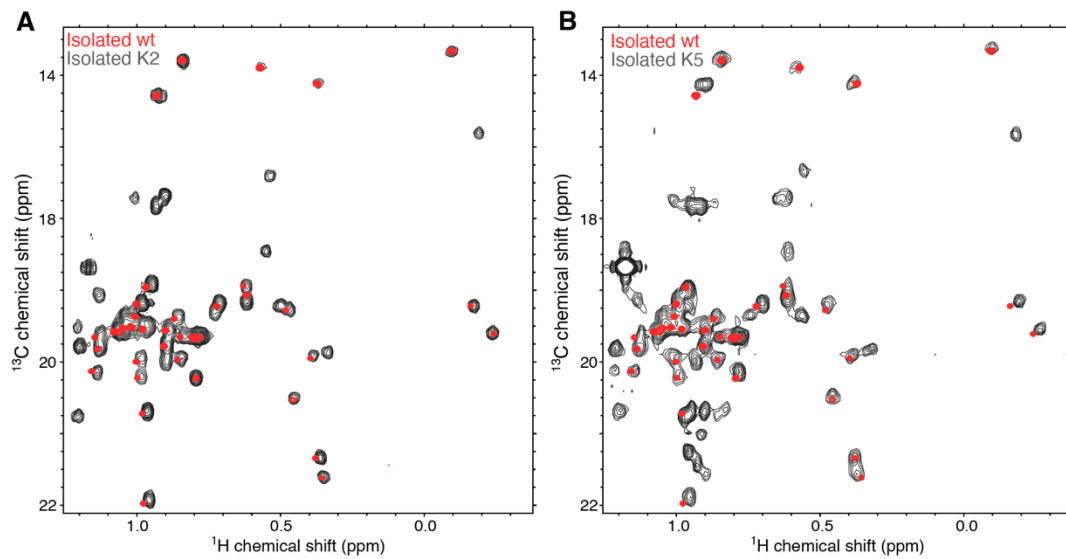

**Supplementary Figure 8:** Comparison of  $^1\text{H}$ ,  $^{13}\text{C}$  HMQC spectra of ILV-labelled FLN5 (298 K, 950 MHz) with isolated unlabeled (A) K2 FLN and (B) K5 FLN (298 K, 500 MHz).

| Construct | Sequence                                                                                                                                                                                                                                |
|-----------|-----------------------------------------------------------------------------------------------------------------------------------------------------------------------------------------------------------------------------------------|
| +47       | MHHHHHHASKPAPSAEHSYAEGEGLVKVFDNAPAEFTIFAVDTKGVARTDGGDPFEVAINGPDGLVVDKAVTDNNDGTYG<br>VVYDAPVEGNYNVNVTLRGNPIKNMPIDVKCIEGANGEDSSFGSFTFTVAANKKKGEVKTYGELFSTPVWIWWWPRIRGPP                                                                   |
| +57       | MHHHHHHASKPAPSAEHSYAEGEGLVKVFDNAPAEFTIFAVDTKGVARTDGGDPFEVAINGPDGLVVDKAVTDNNDGTYG<br>VVYDAPVEGNYNVNVTLRGNPIKNMPIDVKCIEGANGEDSSFGSFTFTVAANKKKGEVKTYGGDKFEVSITGELFSTPVW<br>IWWWPRIRGPP                                                     |
| +67       | MHHHHHHASKPAPSAEHSYAEGEGLVKVFDNAPAEFTIFAVDTKGVARTDGGDPFEVAINGPDGLVVDKAVTDNNDGTYG<br>VVYDAPVEGNYNVNVTLRGNPIKNMPIDVKCIEGANGEDSSFGSFTFTVAANKKKGEVKTYGGDKFEVSITGPAEEITLD<br>AIELFSTPVWIWWWPRIRGPP                                           |
| +110      | MHHHHHHASKPAPSAEHSYAEGEGLVKVFDNAPAEFTIFAVDTKGVARTDGGDPFEVAINGPDGLVVDKAVTDNNDGTYG<br>VVYDAPVEGNYNVNVTLRGNPIKNMPIDVKCIEGANGEDSSFGSFTFTVAANKKKGEVKTYGGDKFEVSITGPAEEITLD<br>AIDNQDGTYYTAAAYSLVGNRSTGVKLNKHIEGSPFKQVLGNTSEFFSTPVWIWWWPRIRGPP |
| +67 GS    | MHHHHHHASKPAPSAEHSYAEGEGLVKVFDNAPAEFTIFAVDTKGVARTDGGDPFEVAINGPDGLVVDKAVTDNNDGTYG<br>VVYDAPVEGNYNVNVTLRGNPIKNMPIDVKCIEGGGGSGGGSGGGSGGGSGGGSGGGSGGGSGGGSGGGSGGGSGGGSG<br>GGELFSTPVWIWWWPRIRGPP                                            |
| +67 K2    | MHHHHHHASKPAPSAEHSYAKGKGLVKVFDNAPAEFTIFAVDTKGVARTDGGDPFEVAINGPDGLVVDKAVTDNNDGTYG<br>VVYDAPVEGNYNVNVTLRGNPIKNMPIDVKCIEGANGEDSSFGSFTFTVAANKKKGEVKTYGGDKFEVSITGPAEEITLD<br>AIELFSTPVWIWWWPRIRGPP                                           |
| +67 K5    | MHHHHHHASKPAPSAEHSYAKGKGLVKVFDNAPAKFKIFAVDTKGVARTDGGDPFEVAINGPDGLVVKAVTDNNDGTYG<br>VVYDAPVEGNYNVNVTLRGNPIKNMPIDVKCIEGANGEDSSFGSFTFTVAANKKKGEVKTYGGDKFEVSITGPAEEITLD<br>AIELFSTPVWIWWWPRIRGPP                                            |
| +67 E6    | MHHHHHHASKPAPSAEHSYAEGEGLVKVFDNAPAEFTIFAVDTKGVARTDGGDPFEVAINGPDGLVVDKAVTDNNDGTYG<br>VVYDAPVEGNYNVEVTLEGEPIENMPIEVECEGANGEDSSFGSFTFTVAANKKKGEVKTYGGDKFEVSITGPAEEITLD<br>AIELFSTPVWIWWWPRIRGPP                                            |

**Supplementary Table 1:** Protein sequences for nascent chains used in this study.

| Methyl | 0% 950 MHz   | 0% 900 MHz   | 40% 950 MHz  | 40% 900 MHz  | 50% 950 MHz  | 50% 900 MHz  | 60% 950 MHz | 60% 900 MHz |
|--------|--------------|--------------|--------------|--------------|--------------|--------------|-------------|-------------|
| L661δ1 | 8.6 ± 0.1    | 9.5 ± 0.1    | 22.2 ± 0.3   | 22.4 ± 0.4   | 34 ± 1       | 33.1 ± 0.5   | 51 ± 6      | 43 ± 2      |
| L661δ2 | 9.3 ± 0.1    | 10.2 ± 0.1   | 23.5 ± 0.5   | 23.3 ± 0.6   | 37 ± 2       | 35.8 ± 0.7   | 52 ± 6      | 58 ± 3      |
| V662γ2 | 6.59 ± 0.07  | 6.94 ± 0.06  | 14.27 ± 0.08 | 13.9 ± 0.1   | 20.8 ± 0.1   | 19.89 ± 0.06 | 29.0 ± 0.3  | 28.1 ± 0.3  |
| V664γ1 | 8.24 ± 0.06  | 8.53 ± 0.06  | 14.84 ± 0.09 | 14.4 ± 0.1   | 20.3 ± 0.1   | 19.42 ± 0.06 | 27.9 ± 0.2  | 27.3 ± 0.3  |
| V664γ2 | 8.03 ± 0.08  | 8.24 ± 0.07  | 16.1 ± 0.1   | 15.3 ± 0.1   | 22.1 ± 0.2   | 20.62 ± 0.09 | -           | -           |
| I674δ1 | 9.52 ± 0.06  | 10.57 ± 0.07 | 24.7 ± 0.2   | 25.6 ± 0.3   | 38.3 ± 0.9   | 38.0 ± 0.4   | 61 ± 5      | 56 ± 2      |
| V677γ1 | 16.1 ± 0.1   | 16.8 ± 0.2   | 27.5 ± 0.4   | 30.3 ± 0.5   | 37.2 ± 0.8   | 41.5 ± 0.6   | 54 ± 2      | 59 ± 2      |
| V677γ2 | 8.28 ± 0.08  | 8.84 ± 0.07  | 19.2 ± 0.1   | 19.9 ± 0.2   | 29.0 ± 0.4   | 29.4 ± 0.2   | 43 ± 1      | 45 ± 1      |
| V682γ1 | 10.0 ± 0.1   | 7.22 ± 0.06  | 15.66 ± 0.08 | 14.8 ± 0.1   | 21.4 ± 0.1   | 21.05 ± 0.06 | -           | 27.0 ± 0.2  |
| V693γ2 | 10.1 ± 0.1   | 10.8 ± 0.1   | 30.4 ± 0.6   | 28.9 ± 0.6   | 42 ± 2       | 43 ± 1       | 67 ± 9      | -           |
| I695δ1 | 9.83 ± 0.07  | 10.39 ± 0.06 | 24.6 ± 0.2   | 24.6 ± 0.3   | 37.6 ± 0.7   | 37.2 ± 0.3   | 54 ± 1      | 52 ± 1      |
| L701δ1 | 5.09 ± 0.09  | 5.22 ± 0.05  | 9.49 ± 0.07  | 9.5 ± 0.07   | 13.9 ± 0.1   | 13.19 ± 0.04 | 19.8 ± 0.2  | 18.9 ± 0.2  |
| L701δ2 | 7.1 ± 0.2    | 8.6 ± 0.2    | 14.3 ± 0.3   | 15.2 ± 0.3   | 21.4 ± 0.5   | 21.2 ± 0.2   | 28 ± 1      | 29 ± 1      |
| V702γ1 | 8.13 ± 0.06  | 7.93 ± 0.06  | 18.4 ± 0.1   | 17.8 ± 0.2   | 27.1 ± 0.3   | 24.9 ± 0.1   | 41.5 ± 0.7  | 30.8 ± 0.3  |
| V702γ2 | 5.54 ± 0.07  | 6.16 ± 0.05  | 13.77 ± 0.09 | 13.28 ± 0.09 | 20.5 ± 0.1   | 20.47 ± 0.07 | 31.7 ± 0.5  | 33.1 ± 0.4  |
| V703γ1 | 8.34 ± 0.08  | 8.53 ± 0.07  | 18.7 ± 0.1   | 17.9 ± 0.2   | 28.9 ± 0.4   | 26.6 ± 0.2   | 39 ± 1      | 41.1 ± 0.9  |
| V703γ2 | 7.66 ± 0.09  | 8.2 ± 0.08   | 19.4 ± 0.2   | 20.4 ± 0.3   | 29.2 ± 0.6   | 31.5 ± 0.3   | 43 ± 2      | 56 ± 1      |
| V707γ1 | 8.79 ± 0.07  | 9.56 ± 0.08  | 21.8 ± 0.2   | 22.8 ± 0.3   | 33.3 ± 0.5   | 32.6 ± 0.3   | 47 ± 2      | 50 ± 1      |
| V707γ2 | 8.23 ± 0.08  | 8.99 ± 0.09  | 23.1 ± 0.3   | 23.3 ± 0.4   | 33.5 ± 0.8   | 35.8 ± 0.5   | 50 ± 3      | 52 ± 2      |
| V717γ1 | 10.22 ± 0.08 | 11.4 ± 0.1   | 25.8 ± 0.4   | 27.2 ± 0.4   | 40 ± 1       | 40.8 ± 0.6   | 58 ± 4      | 59 ± 2      |
| V717γ2 | 11.3 ± 0.1   | 12.9 ± 0.1   | 31.5 ± 0.6   | 30.4 ± 0.7   | 45 ± 2       | 46 ± 1       | 62 ± 8      | 71 ± 6      |
| V718γ1 | 6.05 ± 0.06  | 5.94 ± 0.04  | 11.06 ± 0.05 | 10.91 ± 0.05 | 15.9 ± 0.09  | 14.93 ± 0.03 | 21.9 ± 0.1  | 20.4 ± 0.2  |
| V718γ2 | 5.34 ± 0.06  | 5.13 ± 0.03  | 9.44 ± 0.04  | 9.41 ± 0.04  | 13.67 ± 0.08 | 12.96 ± 0.02 | 19.4 ± 0.2  | 18.1 ± 0.1  |
| V723γ1 | 6.67 ± 0.06  | 6.15 ± 0.04  | 13.8 ± 0.07  | 13.13 ± 0.07 | 21.4 ± 0.1   | 20.33 ± 0.06 | 31.0 ± 0.3  | 29.6 ± 0.3  |
| V723γ2 | 6.06 ± 0.06  | 5.49 ± 0.03  | 13.8 ± 0.08  | 13.35 ± 0.08 | 22.3 ± 0.2   | 21.24 ± 0.07 | 34.1 ± 0.5  | 32.6 ± 0.4  |
| V729γ1 | 9.51 ± 0.09  | 10.5 ± 0.1   | 25.6 ± 0.4   | 26.1 ± 0.5   | 39 ± 1       | 38.6 ± 0.6   | 51 ± 3      | 45 ± 2      |
| V729γ2 | 8.52 ± 0.09  | 9.4 ± 0.1    | 23.9 ± 0.3   | 25.7 ± 0.5   | 38 ± 1       | 38.7 ± 0.6   | -           | -           |
| V731γ1 | 14.3 ± 0.1   | 15.9 ± 0.1   | 36.5 ± 0.9   | 38.9 ± 0.9   | 51 ± 3       | 46 ± 1       | 71 ± 7      | -           |
| L733δ1 | 11.0 ± 0.2   | 9.7 ± 0.1    | 23.1 ± 0.4   | 21.7 ± 0.4   | 32.6 ± 0.9   | 31.1 ± 0.4   | 45 ± 1      | 45 ± 2      |
| L733δ2 | 7.77 ± 0.09  | 7.05 ± 0.08  | 14.0 ± 0.1   | 13.8 ± 0.1   | 19.8 ± 0.2   | 18.86 ± 0.07 | 27.4 ± 0.3  | 26.4 ± 0.4  |
| I738δ1 | 8.63 ± 0.05  | 9.3 ± 0.06   | 21.9 ± 0.1   | 21.8 ± 0.2   | 33.9 ± 0.4   | 32.6 ± 0.2   | 49 ± 1      | 49 ± 1      |
| I743δ1 | 4.6 ± 0.05   | 4.73 ± 0.03  | 9.38 ± 0.05  | 9.4 ± 0.04   | 13.45 ± 0.09 | 13.31 ± 0.03 | 19.4 ± 0.2  | 18.6 ± 0.1  |
| V745γ1 | 8.0 ± 0.06   | 8.46 ± 0.06  | 16.8 ± 0.1   | 16.2 ± 0.1   | 24.1 ± 0.3   | 22.65 ± 0.09 | 32.4 ± 0.4  | 32.2 ± 0.5  |
| I748δ1 | 4.36 ± 0.05  | 4.43 ± 0.03  | 8.85 ± 0.03  | 8.94 ± 0.04  | 13.55 ± 0.07 | 12.9 ± 0.02  | 20.3 ± 0.1  | 19.0 ± 0.1  |

**Supplementary Table 2:** Methyl  $^1\text{H}$   $R_2$  for isolated FLN5 at glycerol concentrations of 0, 40, 50 and 60 % (w/w), acquired at 900 and 950 MHz, 298 K.

| Methyl          | 0%              | 40%              | 50%            | 60%            |
|-----------------|-----------------|------------------|----------------|----------------|
| L661 $\delta$ 1 | 8.2 $\pm$ 0.2   | 30.9 $\pm$ 0.4   | 48 $\pm$ 1     | 73 $\pm$ 2     |
| L661 $\delta$ 2 | 5.5 $\pm$ 0.1   | 20.0 $\pm$ 0.3   | 30.8 $\pm$ 0.6 | 47 $\pm$ 2     |
| V662 $\gamma$ 2 | 5.73 $\pm$ 0.09 | 20.0 $\pm$ 0.2   | 28.9 $\pm$ 0.3 | 45.8 $\pm$ 0.5 |
| V664 $\gamma$ 1 | 2.84 $\pm$ 0.06 | 8.2 $\pm$ 0.1    | 11.5 $\pm$ 0.1 | 17.5 $\pm$ 0.2 |
| V664 $\gamma$ 2 | 2.8 $\pm$ 0.06  | 7.52 $\pm$ 0.07  | 11.2 $\pm$ 0.2 | 19.2 $\pm$ 0.4 |
| I674 $\delta$ 1 | 6.3 $\pm$ 0.1   | 22.1 $\pm$ 0.3   | 33.1 $\pm$ 0.9 | 49 $\pm$ 1     |
| V677 $\gamma$ 1 | 6.6 $\pm$ 0.2   | 26.6 $\pm$ 0.4   | 42.0 $\pm$ 0.8 | 64 $\pm$ 1     |
| V677 $\gamma$ 2 | 7.5 $\pm$ 0.2   | 28.5 $\pm$ 0.3   | 44.1 $\pm$ 0.6 | 66.3 $\pm$ 0.9 |
| V682 $\gamma$ 1 | 5.19 $\pm$ 0.08 | 20.5 $\pm$ 0.3   | 32.2 $\pm$ 0.4 | 49.0 $\pm$ 0.8 |
| V693 $\gamma$ 2 | 6.2 $\pm$ 0.1   | 19.5 $\pm$ 0.4   | 26.4 $\pm$ 0.8 | 42 $\pm$ 2     |
| I695 $\delta$ 1 | 5.5 $\pm$ 0.08  | 18.1 $\pm$ 0.2   | 26.8 $\pm$ 0.3 | 39.8 $\pm$ 0.7 |
| L701 $\delta$ 1 | 2.72 $\pm$ 0.07 | 8.34 $\pm$ 0.07  | 11.2 $\pm$ 0.1 | 16.9 $\pm$ 0.2 |
| L701 $\delta$ 2 | 3.1 $\pm$ 0.1   | 11.7 $\pm$ 0.2   | 17.3 $\pm$ 0.4 | 23.2 $\pm$ 0.8 |
| V702 $\gamma$ 1 | 6.3 $\pm$ 0.1   | 24.2 $\pm$ 0.2   | 38.0 $\pm$ 0.4 | 56 $\pm$ 1     |
| V702 $\gamma$ 2 | 4.51 $\pm$ 0.08 | 16.9 $\pm$ 0.2   | 24.8 $\pm$ 0.3 | 41.3 $\pm$ 0.4 |
| V703 $\gamma$ 1 | 4.8 $\pm$ 0.1   | 16.6 $\pm$ 0.2   | 23.6 $\pm$ 0.4 | 36.0 $\pm$ 0.7 |
| V703 $\gamma$ 2 | 6.8 $\pm$ 0.1   | 24.0 $\pm$ 0.3   | 36.7 $\pm$ 0.7 | 58.0 $\pm$ 0.9 |
| V707 $\gamma$ 1 | 7.2 $\pm$ 0.2   | 26.6 $\pm$ 0.3   | 40.7 $\pm$ 0.4 | 59 $\pm$ 1     |
| V707 $\gamma$ 2 | 6.7 $\pm$ 0.2   | 23.3 $\pm$ 0.3   | 34.8 $\pm$ 0.6 | 47 $\pm$ 1     |
| V717 $\gamma$ 1 | 7.1 $\pm$ 0.1   | 25.5 $\pm$ 0.3   | 38.9 $\pm$ 0.8 | 61 $\pm$ 1     |
| V717 $\gamma$ 2 | 8.7 $\pm$ 0.2   | 31.9 $\pm$ 0.3   | 46 $\pm$ 1     | 64 $\pm$ 4     |
| V718 $\gamma$ 1 | 3.54 $\pm$ 0.07 | 10.6 $\pm$ 0.1   | 14.6 $\pm$ 0.2 | 21.4 $\pm$ 0.2 |
| V718 $\gamma$ 2 | 2.85 $\pm$ 0.04 | 9.12 $\pm$ 0.05  | 11.9 $\pm$ 0.1 | 18.0 $\pm$ 0.2 |
| V723 $\gamma$ 1 | 1.36 $\pm$ 0.03 | 3.16 $\pm$ 0.08  | 5.8 $\pm$ 0.3  | 7.8 $\pm$ 0.1  |
| V723 $\gamma$ 2 | 1.72 $\pm$ 0.03 | 4.47 $\pm$ 0.09  | 6.4 $\pm$ 0.2  | 9.1 $\pm$ 0.2  |
| V729 $\gamma$ 1 | 7.7 $\pm$ 0.2   | 28.0 $\pm$ 0.3   | 42 $\pm$ 1     | 63 $\pm$ 3     |
| V729 $\gamma$ 2 | 8.0 $\pm$ 0.1   | 29.1 $\pm$ 0.4   | 43.4 $\pm$ 0.6 | 63 $\pm$ 2     |
| V731 $\gamma$ 1 | 8.1 $\pm$ 0.2   | 27.0 $\pm$ 0.5   | 39 $\pm$ 2     | 67 $\pm$ 5     |
| L733 $\delta$ 1 | 4.2 $\pm$ 0.1   | 13.2 $\pm$ 0.2   | 21.5 $\pm$ 0.4 | 33.4 $\pm$ 0.7 |
| L733 $\delta$ 2 | 4.2 $\pm$ 0.1   | 14.7 $\pm$ 0.2   | 21.5 $\pm$ 0.3 | 32.5 $\pm$ 0.5 |
| I738 $\delta$ 1 | 6.7 $\pm$ 0.07  | 23.6 $\pm$ 0.2   | 36.2 $\pm$ 0.3 | 56 $\pm$ 1     |
| I743 $\delta$ 1 | 3.17 $\pm$ 0.07 | 9.31 $\pm$ 0.04  | 13.9 $\pm$ 0.1 | 21.6 $\pm$ 0.2 |
| V745 $\gamma$ 1 | 3.43 $\pm$ 0.08 | 10.3 $\pm$ 0.1   | 14.7 $\pm$ 0.2 | 20.9 $\pm$ 0.4 |
| I748 $\delta$ 1 | 3.77 $\pm$ 0.09 | 11.85 $\pm$ 0.06 | 17.3 $\pm$ 0.1 | 25.4 $\pm$ 0.2 |

**Supplementary Table 3:** Methyl  $S_{axis}^2 \tau_c$  values for isolated FLN5 at glycerol concentrations of 0, 40, 50 and 60 % (w/w) recorded at 900 and 950 MHz, 298 K.

| Methyl | $^1\text{H } R_2 \text{ (s}^{-1}\text{)}$ |                |                |                |             |              |              |              |
|--------|-------------------------------------------|----------------|----------------|----------------|-------------|--------------|--------------|--------------|
|        | +67 950 MHz                               | +67 GS 950 MHz | +67 E6 950 MHz | +67 K2 950 MHz | +47 900 MHz | +57 900 MHz  | +67 900 MHz  | +110 900 MHz |
| L661δ1 | 37.7 ± 4.7                                | 35.0 ± 11.0    | 35.0 ± 8.1     | -              | -           | 70.2 ± 9.9   | 50.0 ± 7.2   | 37.3 ± 6.1   |
| L661δ2 | 42.3 ± 5.5                                | 42.0 ± 11.0    | 49.0 ± 20.0    | -              | -           | 88.0 ± 18.0  | 41.7 ± 6.8   | 41.5 ± 7.1   |
| V664γ1 | 26.4 ± 0.61                               | 28.5 ± 2.3     | 28.0 ± 1.4     | 46.8 ± 6.5     | 46.6 ± 7.7  | 42.7 ± 2.3   | 27.2 ± 1.2   | 20.58 ± 0.61 |
| V664γ2 | 21.54 ± 0.65                              | -              | -              | -              | -           | -            | -            | 20.86 ± 0.69 |
| I674δ1 | 48.4 ± 3.3                                | 45.5 ± 8.9     | 40.1 ± 5.3     | -              | -           | 57.3 ± 6.2   | 51.9 ± 4.6   | 35.5 ± 2.1   |
| V677γ1 | 38.9 ± 2.5                                | 43.4 ± 8.9     | 38.7 ± 2.8     | -              | -           | 58.0 ± 5.3   | 41.0 ± 5.9   | 36.6 ± 3.8   |
| V677γ2 | 51.6 ± 6.7                                | -              | 42.0 ± 13.0    | -              | -           | -            | -            | 42.7 ± 6.4   |
| I695δ1 | 44.3 ± 2.5                                | 55.7 ± 8.6     | 49.3 ± 6.2     | 146.0 ± 30.0   | -           | 70.1 ± 6.1   | 45.7 ± 3.4   | 33.7 ± 1.8   |
| L701δ1 | 22.26 ± 0.76                              | 21.1 ± 1.8     | 24.1 ± 2.9     | 82.0 ± 13.0    | -           | 34.4 ± 2.3   | 20.8 ± 1.4   | 15.93 ± 0.62 |
| L701δ2 | 39.3 ± 4.1                                | 43.0 ± 17.0    | -              | -              | -           | 57.7 ± 9.9   | 37.1 ± 6.5   | 27.5 ± 2.2   |
| V702γ1 | 31.0 ± 1.0                                | -              | 27.2 ± 1.2     | -              | 39.8 ± 2.5  | -            | -            | -            |
| V702γ2 | 28.98 ± 0.74                              | 29.3 ± 2.3     | 18.6 ± 1.5     | 84.0 ± 10.0    | -           | 50.7 ± 1.7   | 37.73 ± 0.91 | 21.43 ± 0.83 |
| V703γ1 | 36.7 ± 2.1                                | 31.9 ± 5.3     | 31.3 ± 2.4     | 83.0 ± 20.0    | -           | 52.6 ± 5.8   | 37.6 ± 3.4   | 29.1 ± 2.3   |
| V703γ2 | 50.2 ± 5.7                                | 49.0 ± 15.0    | 33.9 ± 3.2     | -              | -           | 70.8 ± 6.2   | 43.8 ± 8.7   | 31.1 ± 2.8   |
| V707γ1 | 27.5 ± 1.5                                | 27.4 ± 4.1     | -              | -              | -           | -            | -            | -            |
| V707γ2 | 48.0 ± 5.2                                | 35.4 ± 9.3     | 34.4 ± 3.7     | -              | -           | -            | -            | -            |
| V717γ1 | 45.9 ± 7.4                                | 27.0 ± 18.0    | -              | -              | -           | -            | -            | 42.1 ± 5.0   |
| V717γ2 | 56.0 ± 22.0                               | -              | -              | -              | -           | -            | -            | 65.0 ± 21.0  |
| V718γ2 | 20.52 ± 0.32                              | -              | 18.9 ± 1.7     | -              | -           | -            | 20.84 ± 0.83 | 15.13 ± 0.47 |
| V723γ1 | 16.76 ± 0.26                              | 19.43 ± 0.62   | 15.45 ± 0.73   | 44.6 ± 2.3     | 34.6 ± 2.4  | 30.03 ± 0.71 | 17.42 ± 0.55 | 13.92 ± 0.15 |
| V723γ2 | 18.52 ± 0.33                              | 20.77 ± 0.96   | 20.3 ± 1.0     | 37.8 ± 3.3     | 36.8 ± 3.8  | 32.6 ± 1.2   | 18.94 ± 0.67 | 14.27 ± 0.37 |
| V729γ1 | 49.5 ± 6.4                                | -              | 52.0 ± 10.0    | -              | -           | 77.0 ± 12.0  | 44.2 ± 10.0  | 32.4 ± 4.2   |
| V729γ2 | 51.0 ± 12.0                               | -              | -              | -              | -           | -            | -            | 49.0 ± 10.0  |
| V731γ1 | 61.0 ± 16.0                               | -              | -              | -              | -           | -            | -            | 41.7 ± 6.9   |
| L733δ1 | 31.9 ± 1.4                                | 35.7 ± 7.3     | 30.7 ± 2.6     | 85.0 ± 14.0    | 39.0 ± 23.0 | 65.1 ± 4.5   | 32.9 ± 2.6   | 24.6 ± 1.7   |
| L733δ2 | 28.4 ± 1.1                                | 36.3 ± 8.9     | 24.4 ± 2.8     | 64.0 ± 29.0    | -           | 50.7 ± 5.4   | 32.4 ± 2.3   | 21.8 ± 1.0   |
| I738δ1 | 38.1 ± 1.5                                | 46.2 ± 6.3     | 38.0 ± 2.4     | -              | -           | 63.7 ± 3.5   | 41.3 ± 2.1   | 35.0 ± 1.6   |
| I743δ1 | 25.29 ± 0.42                              | 32.0 ± 2.0     | 22.2 ± 1.0     | 63.9 ± 3.9     | 50.0 ± 14.0 | 44.1 ± 1.5   | 25.07 ± 0.2  | 16.96 ± 0.33 |
| V745γ1 | 31.5 ± 1.2                                | 29.9 ± 4.2     | 31.8 ± 2.0     | 47.3 ± 9.8     | -           | 45.5 ± 4.1   | 29.7 ± 1.8   | 22.6 ± 0.91  |
| I748δ1 | 20.32 ± 0.31                              | 21.06 ± 0.79   | 22.9 ± 1.1     | 81.0 ± 18.0    | 33.1 ± 4.2  | 37.1 ± 1.4   | 21.06 ± 0.64 | 14.77 ± 0.33 |

**Supplementary Table 4: Methyl  $^1\text{H } R_2$  measurements for RNCs.**

| Methyl | $S_{axis}^2 \tau_c$ (ns) |                |                |                |              |              |              |              |
|--------|--------------------------|----------------|----------------|----------------|--------------|--------------|--------------|--------------|
|        | +67 950 MHz              | +67 GS 950 MHz | +67 E6 950 MHz | +67 K2 950 MHz | +47 900 MHz  | +57 900 MHz  | +67 900 MHz  | +110 900 MHz |
| L661δ1 | 33.7 ± 4.8               | 31.0 ± 11.0    | 31.0 ± 8.1     | -              | -            | 66.0 ± 11.0  | 45.7 ± 7.6   | 32.9 ± 6.3   |
| L661δ2 | 63.7 ± 9.0               | 63.0 ± 18.0    | 74.0 ± 33.0    | -              | -            | 147.0 ± 33.0 | 65.0 ± 12.0  | 64.0 ± 13.0  |
| V664γ1 | 13.63 ± 0.38             | 14.9 ± 1.4     | 14.59 ± 0.82   | 25.7 ± 3.8     | 28.7 ± 5.2   | 26.0 ± 1.6   | 15.62 ± 0.84 | 11.12 ± 0.41 |
| V664γ2 | 12.8 ± 0.56              | -              | -              | -              | -            | -            | -            | 12.85 ± 0.66 |
| I674δ1 | 45.2 ± 3.7               | 42.3 ± 9.0     | 36.9 ± 5.5     | -              | -            | 53.1 ± 6.4   | 47.7 ± 4.8   | 31.3 ± 2.2   |
| V677γ1 | 63.7 ± 5.1               | 72.0 ± 17.0    | 63.3 ± 5.6     | -              | -            | 95.0 ± 10.0  | 65.0 ± 11.0  | 57.2 ± 7.1   |
| V677γ2 | 66.0 ± 11.0              | -              | 51.0 ± 21.0    | -              | -            | -            | -            | 43.6 ± 9.2   |
| I695δ1 | 33.5 ± 2.3               | 42.7 ± 7.1     | 37.6 ± 5.2     | 116.0 ± 25.0   | -            | 54.7 ± 5.3   | 34.7 ± 3.0   | 24.7 ± 1.6   |
| L701δ1 | 20.4 ± 1.9               | 19.2 ± 2.4     | 22.3 ± 3.5     | 80.0 ± 16.0    | -            | 34.5 ± 3.6   | 19.9 ± 2.0   | 14.6 ± 1.0   |
| L701δ2 | 36.9 ± 5.0               | 40.0 ± 18.0    | -              | -              | -            | 59.0 ± 12.0  | 35.8 ± 7.7   | 24.9 ± 2.9   |
| V702γ1 | 40.7 ± 1.9               | -              | 35.3 ± 2.0     | -              | 54.2 ± 5.3   | -            | -            | -            |
| V702γ2 | 41.3 ± 1.8               | 41.8 ± 4.0     | 23.9 ± 2.6     | 133.0 ± 18.0   | -            | 87.6 ± 5.0   | 62.9 ± 3.1   | 31.9 ± 1.9   |
| V703γ1 | 48.6 ± 3.1               | 41.7 ± 7.7     | 40.8 ± 3.4     | 115.0 ± 28.0   | -            | 62.0 ± 8.6   | 43.4 ± 5.2   | 32.9 ± 3.6   |
| V703γ2 | 48.4 ± 6.8               | 47.0 ± 16.0    | 31.5 ± 3.8     | -              | -            | 73.0 ± 8.8   | 43.0 ± 10.0  | 29.7 ± 3.6   |
| V707γ1 | 33.9 ± 2.2               | 33.8 ± 5.9     | -              | -              | -            | -            | -            | -            |
| V707γ2 | 50.5 ± 5.9               | 37.0 ± 10.0    | 35.6 ± 4.1     | -              | -            | -            | -            | -            |
| V717γ1 | 48.1 ± 8.6               | 26.0 ± 21.0    | -              | -              | -            | -            | -            | 41.7 ± 5.6   |
| V717γ2 | 60.0 ± 25.0              | -              | -              | -              | -            | -            | -            | 72.0 ± 26.0  |
| V718γ2 | 20.4 ± 1.1               | -              | 18.6 ± 2.2     | -              | -            | -            | 22.3 ± 1.3   | 15.16 ± 0.74 |
| V723γ1 | 4.87 ± 0.29              | 5.64 ± 0.39    | 4.49 ± 0.33    | 12.9 ± 1.2     | 10.37 ± 0.95 | 9.02 ± 0.58  | 5.29 ± 0.31  | 4.25 ± 0.2   |
| V723γ2 | 4.5 ± 0.13               | 5.1 ± 0.28     | 4.99 ± 0.3     | 9.64 ± 0.91    | 9.8 ± 1.1    | 8.64 ± 0.41  | 4.87 ± 0.22  | 3.58 ± 0.13  |
| V729γ1 | 57.3 ± 8.1               | -              | 61.0 ± 13.0    | -              | -            | 94.0 ± 16.0  | 52.0 ± 13.0  | 36.2 ± 5.6   |
| V729γ2 | 64.0 ± 16.0              | -              | -              | -              | -            | -            | -            | 58.0 ± 13.0  |
| V731γ1 | 48.0 ± 14.0              | -              | -              | -              | -            | -            | -            | 30.7 ± 6.4   |
| L733δ1 | 40.1 ± 2.7               | 46.0 ± 11.0    | 38.3 ± 4.2     | 118.0 ± 22.0   | 51.0 ± 34.0  | 90.2 ± 6.9   | 42.5 ± 3.9   | 30.3 ± 2.6   |
| L733δ2 | 18.0 ± 1.0               | 24.3 ± 7.2     | 14.8 ± 2.3     | 46.0 ± 23.0    | -            | 36.8 ± 4.4   | 22.3 ± 1.9   | 13.76 ± 0.83 |
| I738δ1 | 42.7 ± 2.1               | 52.6 ± 7.8     | 42.6 ± 3.1     | -              | -            | 76.7 ± 4.8   | 47.9 ± 2.9   | 39.8 ± 2.2   |
| I743δ1 | 28.84 ± 0.77             | 37.1 ± 2.6     | 25.1 ± 1.3     | 76.5 ± 5.1     | 62.0 ± 18.0  | 53.7 ± 2.3   | 29.28 ± 0.7  | 18.88 ± 0.54 |
| V745γ1 | 20.8 ± 1.1               | 19.7 ± 3.2     | 21.1 ± 1.6     | 32.6 ± 7.3     | -            | 33.3 ± 3.6   | 20.6 ± 1.7   | 14.89 ± 0.91 |
| I748δ1 | 27.2 ± 1.9               | 28.2 ± 2.2     | 30.9 ± 2.7     | 112.0 ± 27.0   | 48.4 ± 6.9   | 54.5 ± 3.5   | 29.9 ± 1.6   | 20.19 ± 0.85 |

**Supplementary Table 5:** Calculated methyl  $S_{axis}^2 \tau_c$  values for RNCs.

## References

1. Hsu, S.-T. D., Cabrita, L. D., Fucini, P., Christodoulou, J. & Dobson, C. M. Probing side-chain dynamics of a ribosome-bound nascent chain using methyl NMR spectroscopy. *J. Am. Chem. Soc.* **131**, 8366–8367 (2009).
